# Supplementary material for: A pH-responsive hyaluronic acid hydrogel for regulating the inflammation and remodeling of the ECM in diabetic wounds
Source: Royal Society of Chemistry journal article supplement (doi:10.1039/d2tb00064d), 2022-01-01
Supplement: d2tb00064d1.pdf [file d2tb00064d1.pdf]

## Supporting information

# **A pH-responsiveness injectable hyaluronic acid hydrogel towards regulation of inflammation and remodeling of extracellular matrix for diabetic wound**

Yile Jia<sup>1, a</sup>, Xianhui Zhang<sup>1, a</sup>, Weihu Yang<sup>a\*</sup>, Chuanchuan Lin<sup>a</sup>, Bailong Tao<sup>c</sup>, Zhiwen Deng<sup>a</sup>,  
Pengfei Gao<sup>a</sup>, Yulu Yang<sup>a</sup>, Kaiyong Cai<sup>a, b\*</sup>

<sup>a</sup> Key Laboratory of Biorheological Science and Technology, Ministry of Education, College of Bioengineering, Chongqing University, Chongqing 400044, China

<sup>b</sup> Chongqing Key Laboratory of Soft-Matter Material Chemistry and Function Manufacturing, Chongqing 400715, China

<sup>c</sup> The First Affiliated Hospital of Chongqing Medical University, Chongqing 400016, China

<sup>1</sup> Co-first authors: these authors contributed equally to this work

\* Corresponding author: Prof. Dr. Weihu Yang & Kaiyong Cai

Tel: +86-23-65111802

Fax: +86-23-65102877

E-mail: [yangweihu@cqu.edu.cn](mailto:yangweihu@cqu.edu.cn)

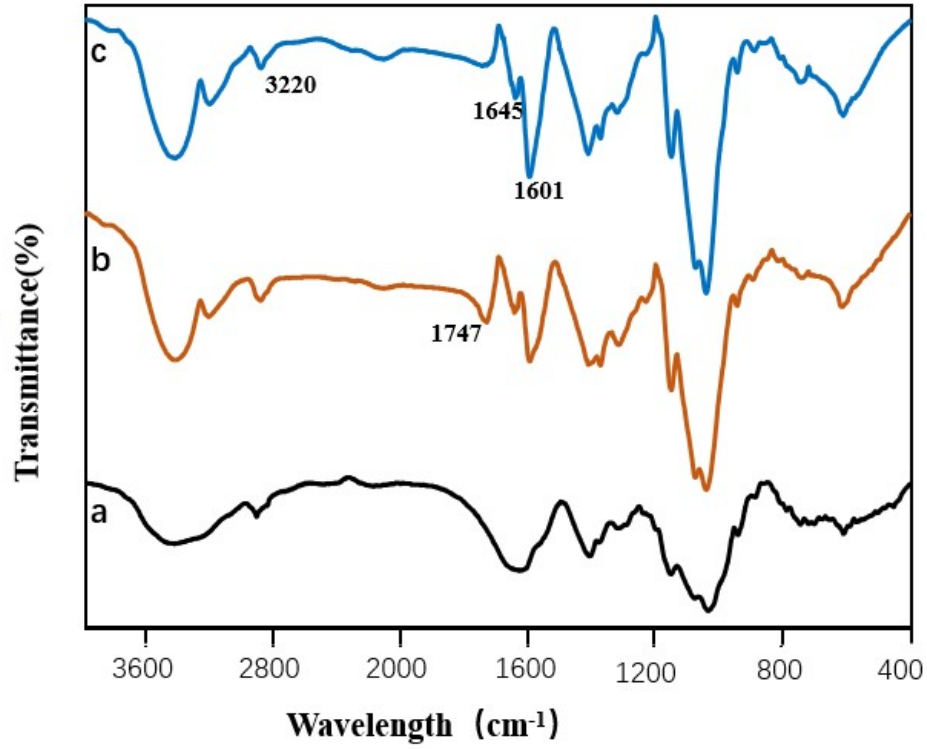

**Figure S1** FT-IR of characterization of HA(a), HA-ALD(b), HA-HYD(c)

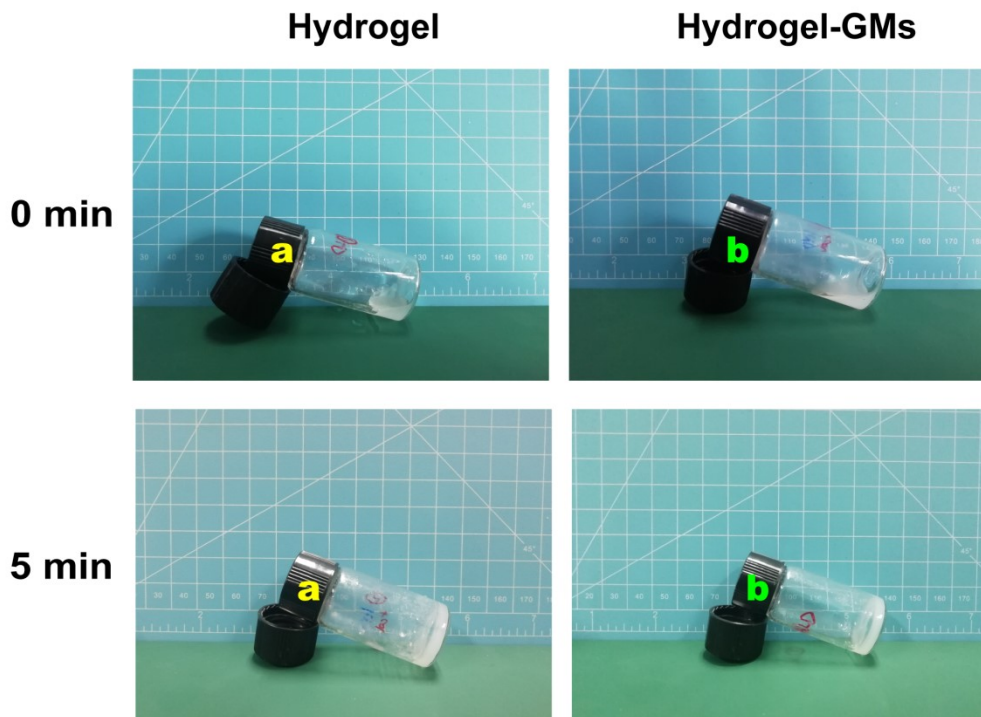

**Figure S2** The gelation process photographs of Hydrogel ( a ) and Hydrogel-MS ( b )

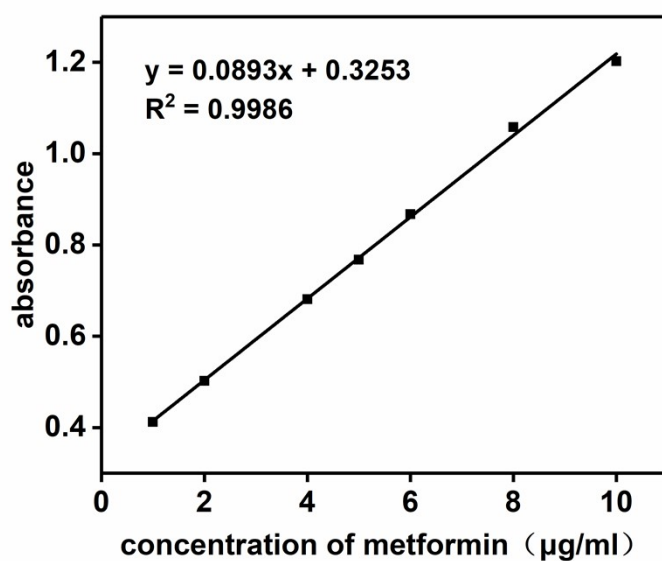

Figure S3 Standard curve of metformin at 233 nm

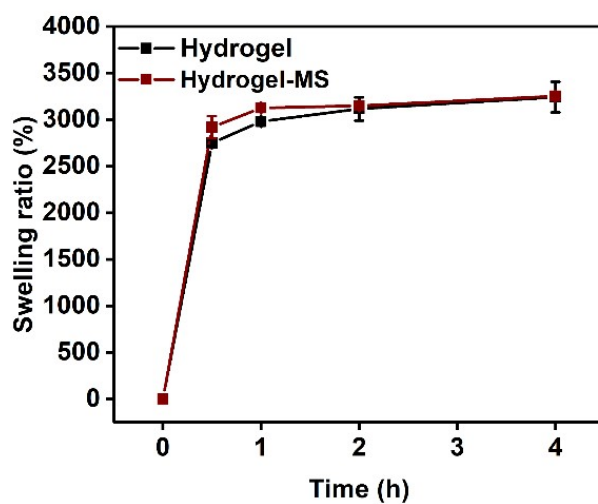

Figure S4 Swelling curves of hydrogel and Hydrogel-MS; n=3
